# Easym1: Easily Build and Evaluate Machine Learning Models

**Paul Hendricks**

Department of Psychology  
The Ohio State University  
Columbus, OH 43210, USA

**Woo-Young Ahn**

Department of Psychology  
The Ohio State University  
Columbus, OH 43210, USA

---

## Abstract

The `easym1` (easy machine learning) package lowers the barrier to entry to machine learning and is ideal for undergraduate/graduate students, and practitioners who want to quickly apply machine learning algorithms to their research without having to worry about the best practices of implementing each algorithm. The package provides standardized recipes for regression and classification algorithms in R and Python and implements them in a functional, modular, and extensible framework. This package currently implements recipes for several common machine learning algorithms (e.g., penalized linear models, random forests, and support vector machines) and provides a unified interface to each one. Importantly, users can run and evaluate each machine learning algorithm *with a single line of coding*. Each recipe is robust, implements best practices specific to each algorithm, and generates a report with details about the model, its performance, as well as journal-quality visualizations. The package's functional, modular, and extensible framework also allows researchers and more advanced users to easily implement new recipes for other algorithms.

*Keywords:* machine learning, data science, supervised learning, data mining, visualization, R, Python.

---

## 1. Introduction

Numerous machine learning libraries (or packages) are becoming available in popular programming languages, especially R (R Core Team 2016) and Python (Rossum 1995). Both languages are high-level, interpreted, employ functional and object-oriented paradigms, and have a wide ecosystem of mature machine learning libraries. However, existing machine learning libraries assume the user has a solid understanding of statistics and machine learning principles and best practices, strong programming skills, and the knowledge of how to apply this skillset to their problem. Oftentimes, this is not the case. Individuals without strong technical background increasingly want to apply machine learning techniques to their research without having to spend years studying mathematics, statistics, and/or computer science and there is a critical need to lower the barrier to machine learning or computational approaches in general (Ahn and Busemeyer 2016; Ahn, Haines, and Zhang 2017). The `easym1` targets these individuals and hopes to lower the barrier to entry to machine learning by providing user-friendly recipes for common machine learning algorithms.

These recipes leverage R and Python’s programming capabilities and their existing machine learning libraries and breaks down each analysis into steps common to all algorithms and steps unique to each algorithm. These steps are abstracted from the user by a common unified framework. Thus, machine learning is like baking a cake; whether one wants to bake a chocolate cake or a vanilla cake, one still needs eggs, flour, and butter as the core ingredients. If you mix them in certain steps and add chocolate, a chocolate cake is baked. If you mix the core ingredients in a certain way and add vanilla, a vanilla cake is baked. Analogously, though one may run similar steps to build and evaluate a penalized linear model (Friedman, Hastie, and Tibshirani 2010; Simon, Friedman, Hastie, and Tibshirani 2011) and a random forest model (Breiman 2001), one will wish to assess the coefficients of the linear model and the variable importances of the random forest model. `easym1` (easy machine learning) makes this easy by handling the best practices for each algorithm but still allows an advanced user the flexibility to customize each recipe.

## 2. Project Vision

*Maintenance* This package is maintained by Paul Hendricks and Woo-Young Ahn.

*Availability* The `easym1` source code is available under the MIT license and hosted on GitHub (<https://github.com/CCS-Lab/easym1>).

*Standardized recipes* The package provides standardized recipes for regression and classification machine learning algorithms in R and Python (see Table 1). Specifically, `easym1` provides recipes and unified interface to some of widely used machine learning algorithms including penalized regression models, random forests, support vector machines (Cortes and Vapnik 1995), Group-Lasso interaction model (Lim and Hastie 2015), and (deep) neural network models. More advanced users will find it easy to implement new recipes for other algorithms. To implement the algorithms, we use other R and Python packages including `glmnet` (Friedman *et al.* 2010), `randomForest` (Liaw and Wiener 2002), `e1071` (Meyer, Dimitriadou, Hornik, Weingessel, and Leisch 2017), `glinternet` (Lim and Hastie 2015), `nnet` (Venables and Ripley 2002), `darch` (Drees 2013), and `scikit-learn` (Pedregosa, Varoquaux, Gramfort, Michel, Thirion, Grisel, Blondel, Prettenhofer, Weiss, Dubourg, Vanderplas, Passos, Cournapeau, Brucher, Perrot, and Duchesnay 2011). We also plan to add more algorithms in the future.

Table 1: List of machine learning models currently implemented in `easym1` (as of v0.1.0).

| Model name                                          | <code>easym1</code> command              | R package                 | Python package            |
|-----------------------------------------------------|------------------------------------------|---------------------------|---------------------------|
| Penalized regression<br>(LASSO, elastic net, ridge) | <code>easy_glmnet</code>                 | <code>glmnet</code>       | <code>glmnet</code>       |
| Random Forest                                       | <code>easy_random_forest</code>          | <code>randomForest</code> | <code>scikit-learn</code> |
| Support Vector Machine                              | <code>easy_support_vector_machine</code> | <code>e1071</code>        | <code>scikit-learn</code> |
| Group-Lasso INTERaction-NET                         | <code>easy_glininternet</code>           | <code>glininternet</code> | N/A                       |
| Neural network                                      | <code>easy_neural_network</code>         | <code>nnet</code>         | N/A                       |
| Deep neural network                                 | <code>easy_deep_neural_network</code>    | <code>darch</code>        | N/A                       |
| Average Neural Network                              | <code>easy_avNNet</code>                 | <code>caret</code>        | N/A                       |

*Journal-quality visualizations* Users will find that `easym1` can immediately produces journal-quality visualizations. These visualizations can be easily be modified, if needed, and used directly in research papers or presentations. See Section 4 for an example.

*Functional, modular, and extensible framework* The package’s functional, modular, and extensible framework also allows researchers and more advanced users to implement new recipes for other algorithms. An example of how to implement a new algorithm is demonstrated in Section 5.

*Parallelization* The nature of machine learning often lends itself to highly parallelizable code. `easym1` makes it possible to run all recipes leveraging as many CPUs as are available. Simply specify the `n_core` parameter in the interface and `easym1` will parallelize the analyze over that number of cores.

*Code quality control* `easym1` uses software engineering best practices such as Continuous Integration (CI) to check the build of the package, Unit Testing and Code Coverage to check the quality of the code, and linting to ensure adherence to a common style. As of this writing, all builds and tests pass on Ubuntu 14.04 and Mac OS X and the Code Coverage is above 85%. The project is also hosted on GitHub (<https://github.com/CCS-Lab/easym1>), and is available to users who want to examine the source code, contribute to the code base, or provide the authors with feedback or alert the authors to potential bugs, both via issues.

*Documentation* `easym1` provides exhaustive documentation and examples for both R and Python. Users interested in the R package can find documentation here: <http://ccs-lab.github.io/easym1>. Users interested in the Python package can find documentation here: <http://easym1.readthedocs.io>.

### 3. Recipes

`easym1` uses standardized recipes for regression and classification machine learning algorithms in R and Python. These recipes can be broken down into multiple steps and are useful for interpreting models (e.g., estimating coefficients and variable importances) or estimating in-sample and out-of-sample performance (e.g., predictions and measures of goodness-of-fit). For each of these recipes, we describe our motivation for including the recipe, a breakdown of the steps in each recipe, and the algorithms that recipe is implemented for.

*Coefficients* Linear models are powerful due to their simplicity, robustness, and interpretability of variables. However, sometimes the estimated coefficients for linear models are different after each run, even with the same random state. This can be due to the low-level code not setting the random state at the C/Fortran level or due to the stochastic nature of the algorithm or optimizer. This phenomenon makes it difficult to interpret a coefficient after building the model only once. To account for this intrinsic randomness and ensure the final coefficients returned are robust estimators, we generate the coefficients `n_samples` times using k-fold cross validation, where `n_samples = 1000` and `k = 10` are set as the defaults, and then calculate the mean and standard deviation of the estimated coefficients. We have applied

and validated this protocol in previous studies (Ahn, Kishida, Gu, Lohrenz, Harvey, Alford, Smith, Yaffe, Hibbing, Dayan *et al.* 2014; Ahn and Vassileva 2016; Ahn, Ramesh, Moeller, and Vassileva 2016; Vilares, Wesley, Ahn, Bonnie, Hoffman, Jones, Morse, Yaffe, Lohrenz, and Montague 2017). The ability to generate beta coefficients is currently implemented only for the penalized linear model algorithm (`easy_glmnet`). See Algorithm 1.

---

**Algorithm 1** Generate coefficients

---

```
1: procedure GENERATE_COEFFICIENTS( $X, y$ )
2:   initialize  $Z$  ▷  $Z$  is an  $n\_samples$  by  $m$  matrix
3:   for  $i$  in  $1, \dots, n\_samples$  do
4:     preprocess  $X$ 
5:     fit model to  $X, y$ 
6:     extract coefficients from model ▷ coefficients are a  $1$  by  $m$  vector
7:     insert the coefficients into row  $i$  of the matrix  $Z$ 
8:   end for
9:   return  $Z$ 
10: end procedure
```

---

*Variable Importances* Ensemble models are powerful due to their simplicity, ability to capture the non-linear patterns of features from the data, and like linear models, their interpretability of variables. As with linear models, we wish to calculate and visualize the importances of the variables as part of our machine learning protocol. Like linear models, ensemble models often have inherent sources of randomness. For example, the random forest algorithm bootstraps the data randomly and randomly selects a subset of predictors to use in each decision tree. Interpretability heuristics such as variable importance scores can often differ from one random state to another. To ensure the resulting variable importances are robust, we can generate the random forest algorithm `n_samples` times, where `n_samples = 1000` is set as the default, and then calculate the mean and standard deviation of the estimated importances. The ability to generate variable importances is currently implemented for the random forest algorithm (`easy_random_forest`), which was used in our recent paper (Haines, Southward, Hendricks, Cohn, Cheavens, and Ahn in preparation). See Algorithm 2.

---

**Algorithm 2** Generate variable importances

---

```
1: procedure GENERATE_VARIABLE_IMPORTANCES( $X, y$ )
2:   initialize  $Z$  ▷  $Z$  is an  $n\_samples$  by  $m$  matrix
3:   for  $i$  in  $1, \dots, n\_samples$  do
4:     preprocess  $X$ 
5:     fit model to  $X, y$ 
6:     extract variable importances from model
7:     insert the variable importances into row  $i$  of the matrix  $Z$ 
8:   end for
9:   return  $Z$ 
10: end procedure
```

---

*Predictions* We often wish to visualize our predictions, whether it's a plot of actual against

predicted values or a plot of the area under the curve (AUC) of a Receiver Operating Characteristic (ROC) curve. If models sometimes produce random, albeit small, deviations in coefficients or weights, these deviations can propagate to our predictions. To guard against this intrinsic error, we train a model using k-fold cross validation within the training set (k = 10 set as the default) and generate predictions `n_samples` times for a particular train-test split (separately on training and test sets). Then we average the predictions across the `n_samples` iterations. By default, the training and test sets are 67% and 33% of the whole dataset and it can be adjusted (e.g., `train_size = 0.67`). The ability to generate predictions is currently implemented for all algorithms. See Algorithm 3 (note that `nrow(Xz)` indicates the number of rows in  $X_z$ ).

---

**Algorithm 3** Generate predictions for single train-test split

---

```
1: procedure GENERATE_PREDICTIONS( $X, y$ )
2:   divide  $X, y$  into  $X_{train}, X_{test}, y_{train}, y_{test}$ 
3:   preprocess  $X_{train}, X_{test}$ 
4:   initialize  $Z_{train}$  ▷  $Z_{train}$  is an  $nrow(X_{train})$  by n_samples matrix
5:   initialize  $Z_{test}$  ▷  $Z_{test}$  is an  $nrow(X_{test})$  by n_samples matrix
6:   for  $i$  in  $1, \dots, n\_samples$  do
7:     fit model to  $X_{train}, y_{train}$ 
8:     use the model to generate predictions for  $X_{train}$ 
9:     insert train predictions into column  $i$  of the matrix  $Z_{train}$ 
10:    use the model to generate predictions for  $X_{test}$ 
11:    insert test predictions into column  $i$  of the matrix  $Z_{test}$ 
12:  end for
13:  return  $Z_{train}, Z_{test}$ 
14: end procedure
```

---

*Model performance* Often we wish to visualize *model performance* representing the quality (i.e., accuracy) of our predictions, whether it's a plot of mean squared errors, correlation coefficients, or AUCs. We can guard against intrinsic errors by replicating predictions many times for a particular train-test split, averaging the predictions across `n_iterations`, generating a model performance metric, and replicating for many (`n_divisions`) different train-test splits. The reader is referred to the Algorithm 4 box for more details. The ability to generate model performance is currently implemented for all algorithms.

## 4. Example

This example demonstrates how to use `easym1` in both R and Python. For further examples on how to use `easym1` in R, please see the documentation at <http://ccs-lab.github.io/easym1>. For further examples on how to use `easym1` in Python, please see the documentation at <http://easym1.readthedocs.io>. In this example, we will use `easym1` to replicate findings reported in Ahn *et al.* (2016) where a penalized logistic regression was used to identify multivariate patterns of behavioral measures that can classify individuals with cocaine dependence. To use `easym1` in R, we must first install the `easym1` library.

```
install.packages("easym1")
```

---

**Algorithm 4** Generate model performance metrics

---

```
1: procedure GENERATE_MODEL_PERFORMANCE( $X, y$ )
2:   initialize  $W_{train}$  ▷  $W_{train}$  is a 1 by  $n\_divisions$  vector
3:   initialize  $W_{test}$  ▷  $W_{test}$  is a 1 by  $n\_divisions$  vector
4:   for  $i$  in  $1, \dots, n\_divisions$  do
5:     divide  $X, y$  into  $X_{train}, X_{test}, y_{train}, y_{test}$ 
6:     initialize  $Z_{train}$  ▷  $Z_{train}$  is a  $nrow(X_{train})$  by  $n\_iterations$  matrix
7:     initialize  $Z_{test}$  ▷  $Z_{test}$  is a  $nrow(X_{test})$  by  $n\_iterations$  matrix
8:     for  $j$  in  $1, \dots, n\_iterations$  do
9:       fit model to  $X_{train}, y_{train}$ 
10:      use the model to generate predictions for  $X_{train}$ 
11:      insert the train predicitions into column  $j$  of the matrix  $Z_{train}$ 
12:      use the model to generate predictions for  $X_{test}$ 
13:      insert the test predicitions into column  $j$  of the matrix  $Z_{test}$ 
14:    end for
15:    calculate the mean of the matrix  $Z_{train}$  across the row axis
16:    generate a metric from  $y_{train}$  and the averaged predictions
17:    insert the metric into slot  $i$  of the vector  $W_{train}$ 
18:    calculate the mean of the matrix  $Z_{test}$  across the row axis
19:    generate a metric from  $y_{test}$  and the averaged predictions
20:    insert the metric into slot  $i$  of the vector  $W_{test}$ 
21:  end for
22:  return  $W_{train}, W_{test}$ 
23: end procedure
```

---

To use easym1 in Python, we must first install the easym1py library using pip. We can accomplish this by running the following in a Bash shell:

```
pip install easym1py
```

Next, let's load the package and the data set in R by executing the following code in an R interpreter.

```
library(easym1)
data("cocaine_dependence", package = "easym1")
```

And in Python, we can accomplish loading the package and the data set by executing the following code in a Python interpreter:

```
from easym1py.glmnet import easy_glmnet
from easym1py.datasets import load_cocaine_dependence
from easym1py.preprocess import preprocess_scale
cocaine_dependence = load_cocaine_dependence()
```

Finally, we pass in the following input arguments to run the analysis:

- `.data` (or just `data` within Python), the data set to be analyzed ( $n \times m$  matrix).  $n$ =the number of samples.  $m$ =the number of features. At this time, it should contain no missing data.
- `dependent_variable`, the name of the dependent variable, which is an  $n$  by 1 vector. In the cocaine data, `diagnosis` (0=healthy control, 1=cocaine user) is the dependent variable.
- `family`, the name of the family of regression with choices are “gaussian” and “binomial”. Since we are modeling a binary dependent variable, we will select “binomial”.
- `preprocess`, the preprocessing function to use on the data. We choose the `preprocess_scale` function so as to scale (z-score) any continuous variable across samples (full data set or train/test data sets) before training a model.
- `exclude_variables`, which variables, if any, should be excluded from the analysis. If there is more than one variable, use the function `c()` (e.g., `exclude_variables = c("subject", "edu_yrs")`).
- `categorical_variables`, which variables are categorical, and thus need to be specially handled during preprocessing. Note that categorical variables will not be normalized. If there is more than one variable, use the function `c()`.
- `random_state`, the seed to use for the random state.
- `model_args`, the list of arguments specific to penalized linear models. See `?glmnet::glmnet`.

In R:

```
model_args = list(alpha = 1, nlambda = 200)
results = easy_glmnet(cocaine_dependence,
                      dependent_variable = "diagnosis",
                      family = "binomial",
                      preprocess = preprocess_scale,
                      exclude_variables = c("subject"),
                      categorical_variables = c("male"),
                      random_state = 12345,
                      model_args = model_args)
```

And in Python:

```
model_args = {'alpha': 1, 'n_lambda': 200}
results = easy_glmnet(cocaine_dependence,
                      dependent_variable="diagnosis",
                      family="binomial",
                      preprocess=preprocess_scale,
                      exclude_variables=["subject"],
                      categorical_variables=["male"],
                      random_state=12345,
                      model_args=model_args)
```

That’s it! Now let’s examine the results. Each algorithm returns a list with objects for various functions, data structures, and plot objects that are instrumental to the analysis. Calling the

names function in R on the variable `results` will show all the slots available to us.

```
print(names(results))
```

```
[1] "call"                "data"
[3] "dependent_variable"  "algorithm"
[5] "class"               "family"
[7] "resample"            "preprocess"
[9] "measure"             "exclude_variables"
[11] "train_size"          "survival_rate_cutoff"
[13] "n_samples"           "n_divisions"
[15] "n_iterations"        "random_state"
[17] "progress_bar"        "n_core"
[19] "generate_coefficients" "generate_variable_importances"
[21] "generate_predictions" "generate_metrics"
[23] "model_args"          "column_names"
[25] "categorical_variables" "y"
[27] "X"                   "coefficients"
[29] "coefficients_processed" "plot_coefficients"
[31] "X_train"             "X_test"
[33] "y_train"             "y_test"
[35] "predictions_train"  "predictions_test"
[37] "plot_predictions_single_train_test_split_train" "plot_predictions"
[39] "plot_predictions_single_train_test_split_test"  "model_performance_test"
[41] "plot_roc_single_train_test_split_test"          "model_performance_train"
[43] "plot_roc_single_train_test_split_train"         "plot_model_performance"
[45] "plot_model_performance_train"                   "plot_model_performance_test"
```

In R, `ggplot2` objects can be accessed via the `$` operator. For example, to examine the ROC Curve for the train data set, we can call the following (see Figure 1A):

```
results$plot_roc_single_train_test_split_train
```

In Python, functions that produce `matplotlib` objects can be accessed via the `.` operator. To mirror the call in Python, we can call the following (see Figure 1B):

```
results.plot_roc_single_train_test_split_train()
```

And we can examine the out-of-sample predictions for the test data set (see Figure 2A).

```
results$plot_roc_single_train_test_split_test
```

And in Python (see Figure 2B):

```
results.plot_roc_single_train_test_split_test()
```



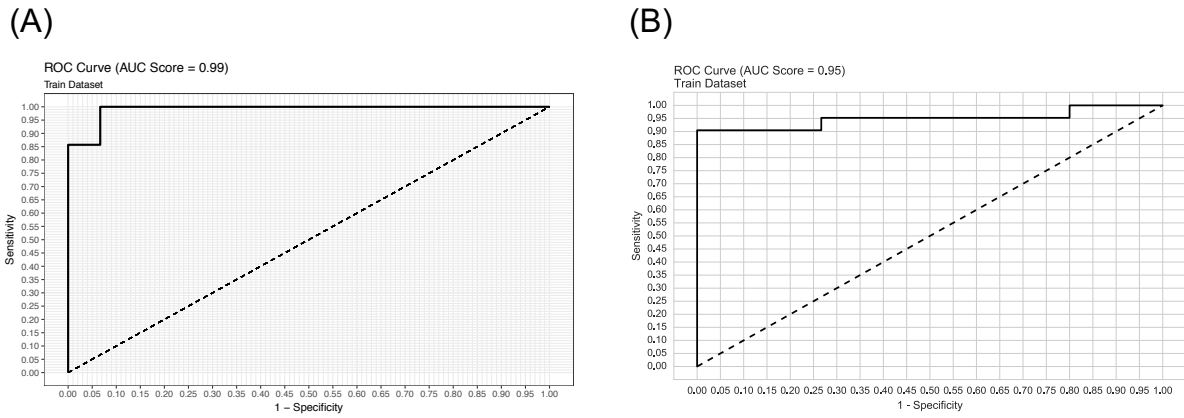

Figure 1: ROC Curve for the train dataset in (A) R and (B) Python.

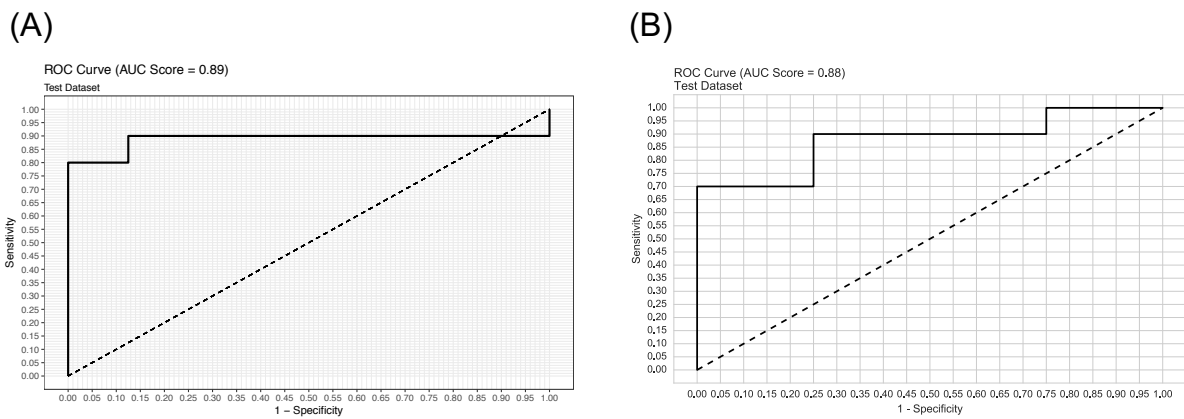

Figure 2: ROC Curve for the test dataset in (A) R and (B) Python.

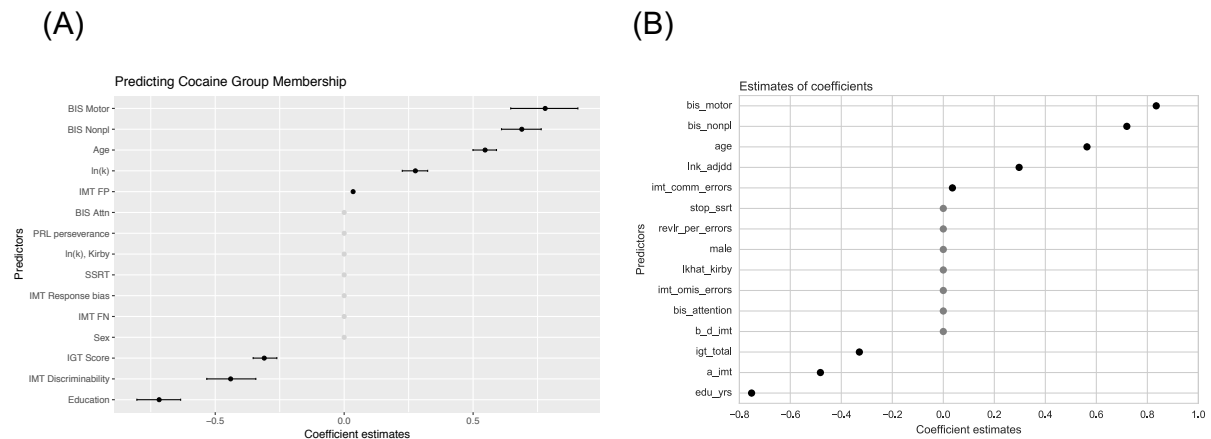

Figure 3: Multivariate patterns of impulsivity measures predicting cocaine dependence in (A) R and (B) Python. Error bars indicate 95% confidence intervals. See Ahn et al. (2016) for more details.

We can also examine the plot of the estimated beta coefficients. See Figure 3 where the coefficient means are represented by the dots and the error bars represent the standard deviations. We could reproduce the almost exact plot that appears in Ahn et al. (2016). These are true ggplot2 objects in R and can be modified however needed:

```
library(ggplot2)
labels = c("Education", "IMT Discriminability", "IGT Score",
          "Sex", "IMT FN", "IMT Response bias",
          "SSRT", "ln(k), Kirby", "PRL perseverance",
          "BIS Attn", "IMT FP", "ln(k)",
          "Age", "BIS Nonpl", "BIS Motor")

results$plot_coefficients +
  scale_x_discrete("Predictors", labels = labels) +
  ggtitle("Predicting Cocaine Group Membership") +
  theme_gray() +
  theme(legend.position = "none")
```

And in Python (see Figure 3B):

```
results.plot_coefficients()
```

As seen in Figure 4A, by calling `results$plot_model_performance_train` in R, we can also examine the in-sample model performance generated for the train data set, which is the distribution of the AUCs of the ROC curves over 1,000 repetitions:

```
results$plot_model_performance_train
```

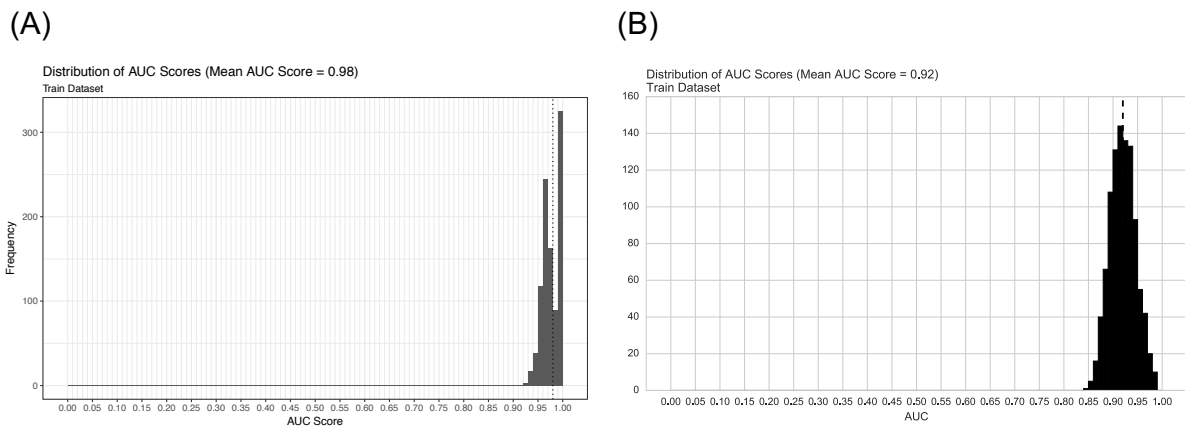

Figure 4: Measures of model performance for the train dataset in (A) R and (B) Python.

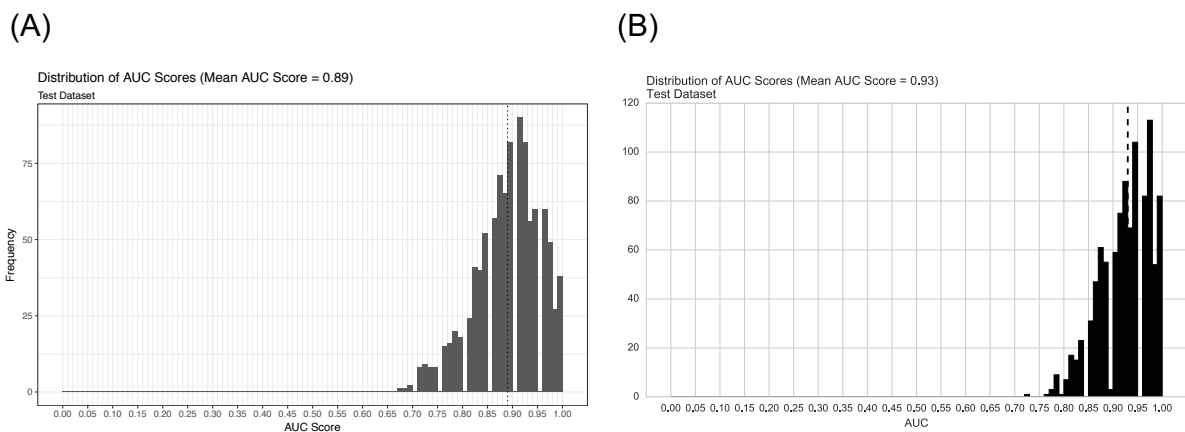

Figure 5: Measures of model performance for the test dataset in (A) R and (B) Python.

And in Python (see Figure 4B):

```
results.plot_model_performance_train()
```

as well as the out-of-sample model performance generated for the test data set by calling `results$plot_model_performance_test` in R (see Figure 5A).

```
results$plot_model_performance_test
```

And in Python (see Figure 5B):

```
results.plot_model_performance_test()
```

Users can run other algorithms as easily by following the same structured interface, with very few modifications to the parameters. For example, to run a random forest model, one would run in R:

```
results = easy_random_forest(cocaine_dependence, "diagnosis",
                             family = "binomial",
                             exclude_variables = "subject",
                             categorical_variables = "male")
```

Or for a support vector machine model, one would run:

```
results = easy_support_vector_machine(cocaine_dependence,
                                      "diagnosis",
                                      family = "binomial",
                                      exclude_variables = "subject",
                                      categorical_variables = "male")
```

## 5. Implementing a New Algorithm

While penalized regression models, random forests, and support vector machines are among some of the most popular algorithms, an advanced user may wish to add an algorithm implemented elsewhere to `easym1` or perhaps even write their own algorithm. `easym1` makes this easy by allowing users to write `wrapper` functions to provide a common interface to those algorithms and pass wrapper functions into `easym1` functions. In Appendix A, we provide an example where we wrap an algorithm that uses averaging over several neural networks. The reader is referred to the `caret` (Kuhn 2016) documentation for details on the `caret::avNNet` function.

## 6. Comparison to Similar Toolkits and Frameworks

R and Python both have a wide ecosystem of machine learning toolkits. `caret` and `mlr` (Bischl, Lang, Kotthoff, Schiffner, Richter, Studerus, Casalicchio, and Jones 2016) are perhaps the most similar packages to `easym1` in R while `scikit-learn` (Pedregosa *et al.* 2011) is perhaps the most similar package to `easym1` in Python. These packages contain algorithms for regression and classification tasks, tools for preprocessing and model interpretation, and all focus on lowering the barrier to entry for machine learning for non-experts. While these packages provide users the flexibility and tools to develop modeling techniques, `easym1` extends the process by allowing users to use standardized recipes for common machine learning techniques and produce journal-quality visualizations, all in a single line of coding.

## 7. Conclusions and Outlook

In conclusion, the `easym1` package fits a specialized niche, and further lowers the barrier to entry to machine learning. Practitioners have immediate access to powerful machine learning algorithms in a single-line of coding in R or Python, without worrying about their implementation or best practices for each algorithm. Researchers with strong programming skills can leverage the `easym1` library to provide customized extensions quickly. We also warn users that the use of `easym1` without sound understanding of machine learning can be potentially

dangerous: we recommend users understand the basic concepts of machine learning and each algorithm they use. Otherwise they may incorrectly use algorithms implemented in `easym1` or interpret the results in a misleading way.

Next steps for `easym1` are likely to include more algorithms and additional recipes and convenience functions to further lower the barrier to entry for machine learning. We also plan make it easy to use `easym1` on neuroimaging data. Specifically, we will allow users to apply a machine learning algorithm to functional magnetic resonance imaging (fMRI) data and produce journal-quality brain maps in a single line of coding.

## **8. Acknowledgement**

We thank Nathaniel Haines for his feedback on various codes and his help on the random forest algorithm.

## **9. Author contributions**

W.-Y.A. conceived the project. P.H. and W.-Y.A. programmed codes and designed/built the package.

## References

- Ahn WY, Busemeyer JR (2016). “Challenges and promises for translating computational tools into clinical practice.” *Current Opinion in Behavioral Sciences*, **11**, 1–7.
- Ahn WY, Haines N, Zhang L (2017). “Revealing neuro-computational mechanisms of reinforcement learning and decision-making with the hBayesDM package.” *Computational Psychiatry*, **1**(1).
- Ahn WY, Kishida KT, Gu X, Lohrenz T, Harvey A, Alford JR, Smith KB, Yaffe G, Hibbing JR, Dayan P, *et al.* (2014). “Nonpolitical images evoke neural predictors of political ideology.” *Current Biology*, **24**(22), 2693–2699.
- Ahn WY, Ramesh D, Moeller FG, Vassileva J (2016). “Utility of Machine-Learning Approaches to Identify Behavioral Markers for Substance Use Disorders: Impulsivity Dimensions as Predictors of Current Cocaine Dependence.” *Frontiers in Psychiatry*, **7**. doi: [10.3389/fpsy.2016.00034](https://doi.org/10.3389/fpsy.2016.00034). URL <https://doi.org/10.3389/fpsy.2016.00034>.
- Ahn WY, Vassileva J (2016). “Machine-learning identifies substance-specific behavioral markers for opiate and stimulant dependence.” *Drug and alcohol dependence*, **161**, 247–257.
- Bischi B, Lang M, Kotthoff L, Schiffner J, Richter J, Studerus E, Casalicchio G, Jones ZM (2016). “mlr: Machine Learning in R.” *Journal of Machine Learning Research*, **17**(170), 1–5. URL <http://jmlr.org/papers/v17/15-066.html>.
- Breiman L (2001). “Random Forests.” *Mach. Learn.*, **45**(1), 5–32. ISSN 0885-6125. doi: [10.1023/A:1010933404324](https://doi.org/10.1023/A:1010933404324). URL <http://dx.doi.org/10.1023/A:1010933404324>.
- Cortes C, Vapnik V (1995). “Support-Vector Networks.” *Mach. Learn.*, **20**(3), 273–297. ISSN 0885-6125. doi: [10.1023/A:1022627411411](https://doi.org/10.1023/A:1022627411411). URL <http://dx.doi.org/10.1023/A:1022627411411>.
- Drees M (2013). *Implementierung und Analyse von tiefen Architekturen in R*. Master’s thesis, Fachhochschule Dortmund.
- Friedman J, Hastie T, Tibshirani R (2010). “Regularization Paths for Generalized Linear Models via Coordinate Descent.” *Journal of Statistical Software*, **33**(1), 1–22. URL <http://www.jstatsoft.org/v33/i01/>.
- Haines N, Southward MW, Hendricks P, Cohn JF, Cheavens JS, Ahn WY (in preparation). “Reading positive and negative emotion intensities from facial expressions using machine learning.”
- Kuhn M (2016). *caret: Classification and Regression Training*. R package version 6.0-73, URL <https://CRAN.R-project.org/package=caret>.
- Liaw A, Wiener M (2002). “Classification and regression by randomForest.” *R news*, **2**(3), 18–22.
- Lim M, Hastie T (2015). “Learning interactions via hierarchical group-lasso regularization.” *Journal of Computational and Graphical Statistics*, **24**(3), 627–654.

- Meyer D, Dimitriadou E, Hornik K, Weingessel A, Leisch F (2017). *e1071: Misc Functions of the Department of Statistics, Probability Theory Group (Formerly: E1071), TU Wien*. R package version 1.6-8, URL <https://CRAN.R-project.org/package=e1071>.
- Pedregosa F, Varoquaux G, Gramfort A, Michel V, Thirion B, Grisel O, Blondel M, Prettenhofer P, Weiss R, Dubourg V, Vanderplas J, Passos A, Cournapeau D, Brucher M, Perrot M, Duchesnay E (2011). “Scikit-learn: Machine Learning in Python.” *Journal of Machine Learning Research*, **12**, 2825–2830.
- R Core Team (2016). *R: A Language and Environment for Statistical Computing*. R Foundation for Statistical Computing, Vienna, Austria. URL <https://www.R-project.org/>.
- Rossum G (1995). “Python Reference Manual.” *Technical report*, Amsterdam, The Netherlands, The Netherlands.
- Simon N, Friedman J, Hastie T, Tibshirani R (2011). “Regularization Paths for Cox’s Proportional Hazards Model via Coordinate Descent.” *Journal of Statistical Software*, **39**(5), 1–13. URL <http://www.jstatsoft.org/v39/i05/>.
- Venables WN, Ripley BD (2002). *Modern Applied Statistics with S*. Fourth edition. Springer, New York. ISBN 0-387-95457-0, URL <http://www.stats.ox.ac.uk/pub/MASS4>.
- Vilares I, Wesley MJ, Ahn WY, Bonnie RJ, Hoffman M, Jones OD, Morse SJ, Yaffe G, Lohrenz T, Montague PR (2017). “Predicting the knowledge–recklessness distinction in the human brain.” *Proceedings of the National Academy of Sciences*, **114**(12), 3222–3227.

## Appendix A.

Below we demonstrate an ordinary way of fitting the `avNNet` model of the `caret` package on the cocaine dataset in R. We see that while we can build this model relatively easily, it takes some extra work to build such as removing the first and second columns from the `cocaine_dependence` dataset. Furthermore, to evaluate this model multiple times with customized train-test splits, preprocessing data, visualize outputs, users need to program many lines of code additionally.

```
library(caret)
data("cocaine_dependence", package = "easym1")

model = avNNet(cocaine_dependence[, c(-1, -2)],
               factor(cocaine_dependence$diagnosis),
               size = 5, linout = TRUE, trace = FALSE)

predictions = predict(model, type = "class")
```

Here we demonstrate the `easym1` way of using this model (see below how we wrapped the algorithm into `easym1`). We see that with very few lines of code, we can enjoy all the features and benefits of `easym1`. For example, users can examine model performance by calling `b$plot_predictions_train_mean` and `b$plot_metrics_test_mean`, etc.

```
model_args = list(size = 5, linout = TRUE, trace = FALSE)
b = easy_avNNet(cocaine_dependence, "diagnosis",
                family = "binomial",
                preprocess = preprocess_scale,
                exclude_variables = c("subject"),
                categorical_variables = c("male"),
                n_samples = 10, n_divisions = 10,
                n_iterations = 10, random_state = 12345,
                n_core = 1, model_args = model_args)

g = easy_avNNet(prostate, "lpsa",
                preprocess = preprocess_scale,
                n_samples = 10, n_divisions = 10,
                n_iterations = 10,
                random_state = 12345, n_core = 1,
                model_args = model_args)
```



Here we show how we wrapped the avNNet algorithm into easym1.

```
library(easym1)

fit_model.easy_avNNet = function(object) {
  model_args = object[["model_args"]]
  model_args[["x"]] = as.matrix(object[["X"]])
  model_args[["y"]] = object[["y"]]
  model = do.call(caret::avNNet, model_args)
  object[["model_args"]] = model_args
  object[["model"]] = model
  object
}

predict_model.easy_avNNet = function(object, newx = NULL) {
  newx = as.matrix(newx)
  model = object[["model"]]
  family = object[["family"]]
  if (family == "gaussian") {
    type = "raw"
  } else if (family == "binomial") {
    type = "class"
  }
  preds = stats::predict(model, newdata = newx, type = type)
  preds
}

easy_avNNet = function(.data, dependent_variable,
                      family = "gaussian", resample = NULL,
                      preprocess = preprocess_scale,
                      measure = NULL,
                      exclude_variables = NULL,
                      categorical_variables = NULL,
                      train_size = 0.667, foldid = NULL,
                      survival_rate_cutoff = 0.05,
                      n_samples = 1000, n_divisions = 1000,
                      n_iterations = 10,
                      random_state = NULL,
                      progress_bar = TRUE, n_core = 1,
                      coefficients = FALSE,
                      variable_importances = FALSE,
                      predictions = TRUE, metrics = TRUE,
                      model_args = list()) {
  easy_analysis(.data, dependent_variable,
               algorithm = "avNNet",
               family = family, resample = resample,
```

```
    preprocess = preprocess, measure = measure,  
    exclude_variables = exclude_variables,  
    categorical_variables = categorical_variables,  
    train_size = train_size, foldid = foldid,  
    survival_rate_cutoff = survival_rate_cutoff,  
    n_samples = n_samples,  
    n_divisions = n_divisions,  
    n_iterations = n_iterations,  
    random_state = random_state,  
    progress_bar = progress_bar, n_core = n_core,  
    coefficients = coefficients,  
    variable_importances = variable_importances,  
    predictions = predictions, metrics = metrics,  
    model_args = model_args)  
}
```

**Affiliation:**

Woo-Young Ahn  
Department of Psychology  
The Ohio State University  
Columbus, OH 43210, USA  
E-mail: [ahn.280@osu.edu](mailto:ahn.280@osu.edu)  
URL: <http://ccs-lab.github.io>
